# Supplementary material for: Phosphoethanolamine Transferases as Drug Discovery Targets for Therapeutic Treatment of Multi-Drug Resistant Pathogenic Gram-Negative Bacteria
Source: MDPI journal article supplement (doi:10.3390/antibiotics12091382), 2023-08-29
Supplement: s1 [file s1]

**Table S1: The representative PEA transferases for constructing phylogenetic tree.**

| Origin                                 | Strain                  | Accession number | Protein name | Reference |
|----------------------------------------|-------------------------|------------------|--------------|-----------|
| <i>Escherichia coli</i>                | K12                     | AAC77075         | EptA         | [17]      |
| <i>Salmonella enterica</i> Typhimurium | LT2                     | P36555           | EptA         | [34]      |
| <i>Acinetobacter baumannii</i>         | ATCC 17978              | G1CBN7           | EptA         | [36]      |
| <i>Shigella flexneri</i>               | 301                     | A0A0H2VXP0       | EptA         | [17]      |
| <i>Klebsiella pneumoniae</i>           | HS11286                 | A0A0H3GLS1       | EptA         | [17]      |
| <i>Helicobacter pylori</i>             | 26695                   | ABE02822         | EptA         | [38]      |
| <i>Pseudomonas aeruginosa</i>          | PAO1                    | Q9HYT4           | EptA         | [17]      |
| <i>Vibrio cholerae</i>                 | O1 biovar El Tor N16961 | Q9KKK2           | EptA         | [41]      |
| <i>Neisseria meningitidis</i>          | MC58                    | Q7DD94           | EptA         | [49]      |
| <i>Neisseria gonorrhoeae</i>           | FA1090                  | KAE9493802       | EptA         | [17]      |
| <i>Haemophilus ducreyi</i>             | 35000HP                 | AAP95743         | EptA         | [53]      |
| <i>Cronobacter sakazakii</i>           | ATCC BAA-894            | A7MFE0           | ESA_RS09200  | [54]      |
| <i>Vibrio parahaemolyticus</i>         | RIMD 2210633            | VP_RS21300       | VP_RS21300   | [55]      |
| <i>Pasteurella multocida</i>           | AL435                   | OBP27748         | PetL         | [18]      |
| <i>Moraxella catarrhalis</i>           | BC1                     | EGE18576.1       | ICR          | [57]      |
| <i>Moraxella osloensis</i>             | CCUG 350                | AME01623         | ICR          | [15]      |
| <i>Escherichia coli</i>                | GDP6F1                  | ATZ71845         | MCR-1        | [71]      |
| <i>Escherichia coli</i>                | KP37                    | SBV31106         | MCR-2        | [72]      |
| <i>Escherichia coli</i>                | WJ1                     | WP_104769708     | MCR-3        | [58]      |
| <i>Salmonella enterica</i> Typhimurium | R3445                   | ASR73329         | MCR-4        | [59]      |

|                                        |                              |              |             |      |
|----------------------------------------|------------------------------|--------------|-------------|------|
| <i>Salmonella enterica</i> Typhimurium | B dTa+ isolate 13-SA01718    | WP_229654935 | MCR-5       | [60] |
| <i>Moraxella pluranimalium</i>         | AM884564                     | AVA17336     | MCR-6       | [73] |
| <i>Klebsiella pneumoniae</i>           | SC20141012                   | WP_104009851 | MCR-7       | [62] |
| <i>Klebsiella pneumoniae</i>           | KP91                         | UIX51983     | MCR-8       | [74] |
| <i>Salmonella enterica</i> Typhimurium | HUM_TYPH_WA_10_R9_3274       | QCC62183     | MCR-9       | [65] |
| <i>Enterobacter roggenkampii</i>       | WCHER090065                  | QDO66747     | MCR-10      | [64] |
| <i>Pasteurella multocida</i>           | AL435                        | OBP26495     | PetK        | [18] |
| <i>Escherichia coli</i>                | W3110                        | Q38J80       | EptB        | [81] |
| <i>Salmonella enterica</i> Typhimurium | ATCC14028                    | UVD93218     | EptB        | [86] |
| <i>Yersinia pestis</i>                 | subsp. Pestis bv. Medievalis | A0A5P8RYF1   | EptB        | [88] |
| <i>Campylobacter jejuni</i>            | NCTC 11168                   | Q0PBP9       | EptC        | [78] |
| <i>Escherichia coli</i>                | K12                          | P0CB39       | EptC        | [21] |
| <i>Salmonella enterica</i> Typhimurium | LT2                          | Q7CPC0       | EptC (CptA) | [22] |
| <i>Neisseria gonorrhoeae</i>           | FA1090                       | WP_171000415 | Lpt3        | [99] |
| <i>Neisseria meningitidis</i>          | MC58                         | WP_118818077 | Lpt3        | [92] |
| <i>Pasteurella multocida</i>           | P1702                        | D0EAD9       | Lpt3        | [56] |
| <i>Neisseria meningitidis</i>          | MC58                         | C5IWX1       | Lpt6        | [92] |
| <i>Neisseria gonorrhoeae</i>           | FA19                         | WP_050162946 | Lpt6        | [93] |
| <i>Haemophilus influenzae</i>          | Rd                           | WP_233775356 | Lpt6        | [91] |
| <i>Proteus mirabilis</i>               | HI4320                       | B4F0R8       | EptC        | [95] |
| <i>Pasteurella multocida</i>           | AL435                        | OBP28286     | PetG        | [18] |
| <i>Shigella flexneri</i>               | 2002017                      | ADA77030     | Lpt-O       | [24] |

|                                        |         |              |      |      |
|----------------------------------------|---------|--------------|------|------|
| <i>Neisseria gonorrhoeae</i>           | FA19    | Q9RMJ3       | PptA | [30] |
| <i>Neisseria meningitidis</i>          | Z2491   | WP_002237381 | PptA | [29] |
| <i>Salmonella enterica</i> Typhimurium | LT2     | Q7CPI7       | BcsG | [27] |
| <i>Escherichia coli</i>                | K12     | P37659       | BcsG | [25] |
| <i>Escherichia coli</i>                | K12     | P75785       | OpgE | [28] |
| <i>Haemophilus ducreyi</i>             | 35000HP | AAP95341     | PtdA | [53] |
| <i>Haemophilus ducreyi</i>             | 35000HP | AAP96378     | PtdB | [53] |
